# Supplementary material for: Effects of Yeast Mannan Which Promotes Beneficial Bacteroides on the Intestinal Environment and Skin Condition: A Randomized, Double-Blind, Placebo-Controlled Study
Source: PubMed Central journal article supplement (PMC7761098; doi:10.3390/nu12123673), 2020-11-28
Supplement: nutrients-12-03673-s001.pdf [file nutrients-12-03673-s001.pdf]

## Supplementary Information

### Title

#### **Effects of Yeast Mannan which Promotes Beneficial *Bacteroides* on the Intestinal Environment and Skin Condition: A Randomized, Double-Blind, Placebo-Controlled Study**

Reiko Tanihiro <sup>1\*</sup>, Katsuhisa Sakano <sup>1</sup>, Shunsuke Oba <sup>1</sup>, Chikako Nakamura <sup>1</sup>, Kohji Ohki <sup>1</sup>, Tatsuhiko Hirota <sup>1</sup>, Hiroshi Sugiyama <sup>1</sup>, Shukuko Ebihara <sup>2</sup>, and Yasunori Nakamura <sup>1</sup>

<sup>1</sup>Core Technology Laboratories, Asahi Quality and Innovations, Ltd., 1-21, Midori 1-chome, Moriya-shi, Ibaraki 302-0106, Japan;

katsuhisa.sakano@asahi-qi.co.jp (K.S.); shunsuke.oba@asahi-qi.co.jp (S.O.); chikako.nakamura@asahi-qi.co.jp (C.N.); koji.oki@asahi-qi.co.jp (K.O.);

tatsuhiko.hirota@asahi-qi.co.jp (T.H.); hiroshi.sugiyama@asahi-qi.co.jp (H.S.); yasunori.nakamura@asahi-qi.co.jp (Y.N.)

<sup>2</sup>Chiyoda Paramedical Care Clinic; info@cpcc.co.jp

\*Correspondence: reiko.tanihiro@asahi-qi.co.jp; Tel.: +81-297-46-9347

**Table S1.** qPCR amplification conditions for each bacterial species.

| Target species             | Primer-F<br>Primer-R (5' to 3')<br>Probe (5' FAM - 3' TAMRA)                  | Strains for<br>standard curves           | PCR amplification condition                                                            | Ref. |
|----------------------------|-------------------------------------------------------------------------------|------------------------------------------|----------------------------------------------------------------------------------------|------|
| All eubacteria             | CGGTGAATACGTTCCCGG<br>TACGGCTACCTTGTTACGACTT                                  | <i>B. fragilis</i><br>ATCC 25285         | 95 °C for 10 s,<br>[95 °C for 20 s, 56 °C for 20 s,<br>and 72 °C for 30 s] × 40 cycles | 24   |
| <i>B. thetaiotaomicron</i> | GCAAACCTGGAGATGGCGA<br>AAGGTTTGGTGAGCCGTTA<br>TCGATGGGGATGCGTTCCATTAGG        | <i>B. thetaiotaomicron</i><br>ATCC 29741 | 95 °C for 30 s,<br>[95 °C for 15 s and 62.5 °C for 60 s]<br>× 40 cycles                | 23   |
| <i>B. ovatus</i>           | TGCAAACCTRAAGATGGC<br>CAAACCTAATGGAACGCATC<br>CACGTATCCAACCTGCCGATAACTCC      | <i>B. ovatus</i><br>ATCC 8483            | 95 °C for 30 s,<br>[95 °C for 15 s and 58 °C for 60 s]<br>× 40 cycles                  | 23   |
| <i>B. vulgatus</i>         | CGGGCTTAAATTGCAGATGA<br>CATGCAGCACCTTCACAGAT<br>TGAAAGCCGTAAGCCGCAAGG         | <i>B. vulgatus</i><br>ATCC 8482          | 95 °C for 30 s,<br>[95 °C for 15 s and 63 °C for 60 s]<br>× 40 cycles                  | 23   |
| <i>B. uniformis</i>        | TCTTCCGCATGGTAGAACTATTA<br>ACCGTGTCTCAGTTCCAATGTG<br>CGTTCCATTAGGTTGTTGGCGGGG | <i>B. uniformis</i><br>ATCC 8492         | 95 °C for 30 s,<br>[95 °C for 15 s and 60 °C for 60 s]<br>× 40 cycles                  | 23   |
| <i>B. fragilis</i>         | TCRGAAGAAAGCTTGCT<br>CATCCTTTACCGGAATCCT<br>ACACGTATCCAACCTGCCCTTACTCG        | <i>B. fragilis</i><br>ATCC 25285         | 95 °C for 30 s,<br>[95 °C for 15 s and 63 °C for 60 s]<br>× 40 cycles                  | 23   |

**Table S2.** Comparison of relative abundance of *Bacteroides* species between the YM and placebo group.

| Species                      | Treatment | Changes from baseline |              |
|------------------------------|-----------|-----------------------|--------------|
|                              |           | 4 Weeks               | 8 Weeks      |
| <i>B. thetaiotaomicron</i> * | YM        | 1.45 ± 0.76           | 0.51 ± 0.17  |
|                              | Placebo   | -0.07 ± 0.15          | 0.13 ± 0.14  |
| <i>B. ovatus</i> *           | YM        | 1.81 ± 0.74           | 1.09 ± 0.38  |
|                              | Placebo   | 0.28 ± 0.43           | 0.16 ± 0.28  |
| <i>B. vulgatus</i>           | YM        | 0.59 ± 0.33           | 0.28 ± 0.35  |
|                              | Placebo   | 0.23 ± 0.23           | 0.23 ± 0.20  |
| <i>B. uniformis</i>          | YM        | 0.40 ± 0.26           | 0.31 ± 0.36  |
|                              | Placebo   | -0.06 ± 0.32          | 0.12 ± 0.32  |
| <i>B. fragilis</i>           | YM        | 0.09 ± 0.05           | 0.02 ± 0.03  |
|                              | Placebo   | -0.06 ± 0.14          | -0.11 ± 0.13 |

Data represent the mean ± standard error (SE). Asterisks indicate overall significance between groups across time points measured using repeated measures ANOVA for the changes from baseline without multiple comparison correction (\*  $p < 0.05$ ).

**Table S3.** Comparison of bowel habits and fecal conditions between the YM and placebo group.

| Item                   | Unit       | Treatment | Baseline |       | 4 Weeks |       | 8 Weeks |       |
|------------------------|------------|-----------|----------|-------|---------|-------|---------|-------|
| Defecation days *      | days/week  | YM        | 5.3      | ± 0.2 | 5.5     | ± 0.2 | 5.6     | ± 0.2 |
|                        |            | Placebo   | 5.4      | ± 0.2 | 5.2     | ± 0.2 | 5.3     | ± 0.2 |
| Defecation times       | times/week | YM        | 5.9      | ± 0.2 | 6.1     | ± 0.2 | 6.5     | ± 0.3 |
|                        |            | Placebo   | 5.7      | ± 0.2 | 5.7     | ± 0.2 | 5.9     | ± 0.2 |
| BSS                    |            | YM        | 3.8      | ± 0.1 | 3.8     | ± 0.1 | 3.9     | ± 0.1 |
|                        |            | Placebo   | 3.8      | ± 0.1 | 3.9     | ± 0.1 | 3.8     | ± 0.1 |
| Fecal water contents** | %          | YM        | 72.4     | ± 1.0 | 74.3    | ± 1.0 | 73.4    | ± 0.9 |
|                        |            | Placebo   | 74.7     | ± 0.9 | 72.7    | ± 0.9 | 72.4    | ± 0.9 |

Data represent the mean ± SE. BSS: Bristol Stool Scale. Asterisks indicate overall significance between groups across time points measured using repeated measures ANOVA for the changes from baseline without multiple comparison correction (\*  $p < 0.05$ , \*\*  $p < 0.01$ ).

**Table S4.** Comparison of CAS scores between the YM and placebo group.

| Item                                    | Treatment | Baseline |        | 4 Weeks |        | 8 Weeks |        |
|-----------------------------------------|-----------|----------|--------|---------|--------|---------|--------|
| Inability to pass stool**               | YM        | 0.43     | ± 0.08 | 0.20    | ± 0.07 | 0.27    | ± 0.06 |
|                                         | Placebo   | 0.33     | ± 0.07 | 0.39    | ± 0.07 | 0.41    | ± 0.07 |
| Less frequent bowel movements*          | YM        | 0.08     | ± 0.04 | 0.08    | ± 0.04 | 0.04    | ± 0.03 |
|                                         | Placebo   | 0.08     | ± 0.04 | 0.18    | ± 0.06 | 0.16    | ± 0.05 |
| Small volume of stool*                  | YM        | 0.14     | ± 0.05 | 0.06    | ± 0.03 | 0.04    | ± 0.03 |
|                                         | Placebo   | 0.04     | ± 0.03 | 0.10    | ± 0.04 | 0.08    | ± 0.04 |
| Abdominal distention or bloating        | YM        | 0.31     | ± 0.07 | 0.33    | ± 0.07 | 0.31    | ± 0.07 |
|                                         | Placebo   | 0.45     | ± 0.08 | 0.25    | ± 0.06 | 0.35    | ± 0.07 |
| Change in amount of gas passed rectally | YM        | 0.27     | ± 0.08 | 0.33    | ± 0.08 | 0.20    | ± 0.07 |
|                                         | Placebo   | 0.18     | ± 0.07 | 0.12    | ± 0.05 | 0.18    | ± 0.07 |
| Rectal fullness or pressure             | YM        | 0.39     | ± 0.08 | 0.27    | ± 0.06 | 0.24    | ± 0.06 |
|                                         | Placebo   | 0.31     | ± 0.07 | 0.39    | ± 0.07 | 0.31    | ± 0.07 |
| Rectal pain with bowel movements        | YM        | 0.10     | ± 0.04 | 0.12    | ± 0.05 | 0.16    | ± 0.05 |
|                                         | Placebo   | 0.06     | ± 0.03 | 0.06    | ± 0.03 | 0.12    | ± 0.05 |
| Oozing liquid stool                     | YM        | 0.10     | ± 0.04 | 0.10    | ± 0.04 | 0.12    | ± 0.05 |
|                                         | Placebo   | 0.16     | ± 0.05 | 0.12    | ± 0.05 | 0.14    | ± 0.05 |
| Total CAS score                         | YM        | 1.82     | ± 0.27 | 1.49    | ± 0.24 | 1.39    | ± 0.20 |
|                                         | Placebo   | 1.61     | ± 0.22 | 1.61    | ± 0.23 | 1.75    | ± 0.22 |

Data represent the mean ± SE. CAS: Constipation assessment scale. Asterisks indicate overall significance between groups across time points measured using repeated measures ANOVA for the changes from baseline without multiple comparison correction (\*  $p < 0.05$ , \*\*  $p < 0.01$ ).

**Table S5.** Comparison of fecal putrefactive compound levels between the YM and placebo group.

| Fecal metabolite            | Unit       | Treatment | Changes from baseline |        |         |        |
|-----------------------------|------------|-----------|-----------------------|--------|---------|--------|
|                             |            |           | 4 Weeks               |        | 8 Weeks |        |
| Indole**                    | µg/g-feces | YM        | -10.8                 | ± 5.2  | -0.3    | ± 5.0  |
|                             |            | Placebo   | 8.5                   | ± 3.3  | 10.0    | ± 3.2  |
| <i>p</i> -Cresol*           |            | YM        | -21.0                 | ± 12.6 | 9.2     | ± 16.8 |
|                             |            | Placebo   | 24.4                  | ± 8.6  | 28.3    | ± 9.0  |
| Skatole*                    |            | YM        | -1.2                  | ± 1.1  | -0.8    | ± 2.0  |
|                             |            | Placebo   | 2.2                   | ± 1.3  | 2.8     | ± 1.2  |
| Phenol                      |            | YM        | -2.1                  | ± 1.9  | -2.6    | ± 1.5  |
|                             |            | Placebo   | -1.9                  | ± 1.0  | -2.1    | ± 1.7  |
| 4-Ethylphenol               |            | YM        | -0.1                  | ± 0.6  | -0.2    | ± 0.5  |
|                             |            | Placebo   | 0.3                   | ± 0.5  | 0.2     | ± 0.5  |
| Sum of phenols and indoles* | YM         | -35.2     | ± 17.3                | 5.4    | ± 22.4  |        |
|                             | Placebo    | 33.5      | ± 11.5                | 39.3   | ± 12.1  |        |
| Ammonia*                    | YM         | -59.4     | ± 49.5                | 60.3   | ± 50.4  |        |
|                             | Placebo    | 61.9      | ± 36.4                | 187    | ± 49.2  |        |

Data represent the mean ± SE. Asterisks indicate overall significance between groups across time points measured using repeated measures ANOVA for the changes from baseline without multiple comparison correction (\*  $p < 0.05$ , \*\*  $p < 0.01$ ).

YM group

Placebo group

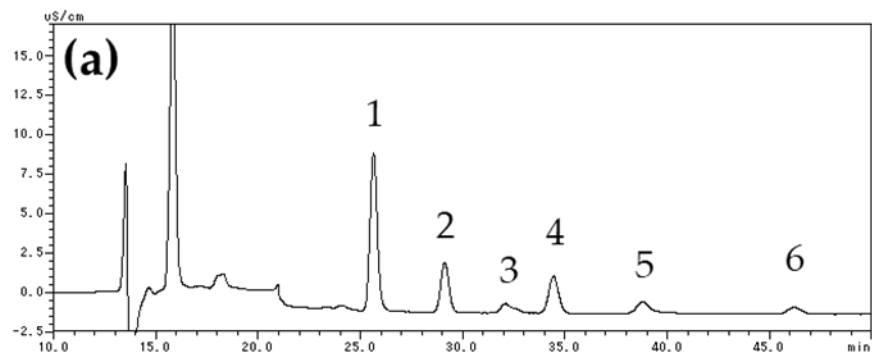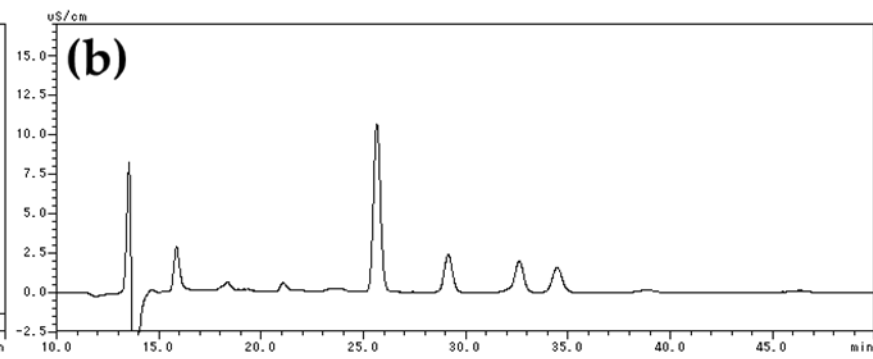

0 Weeks

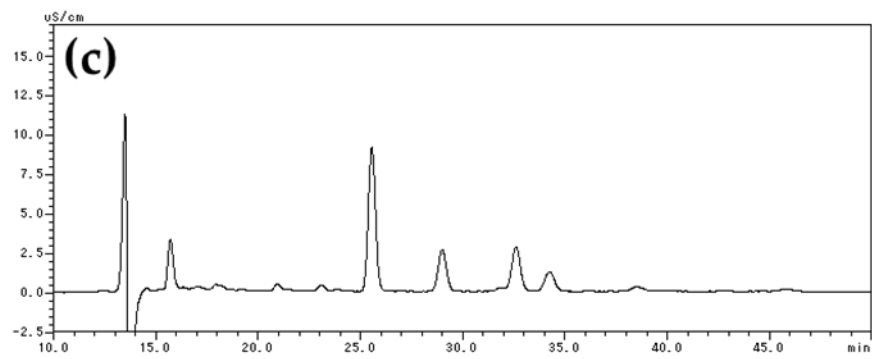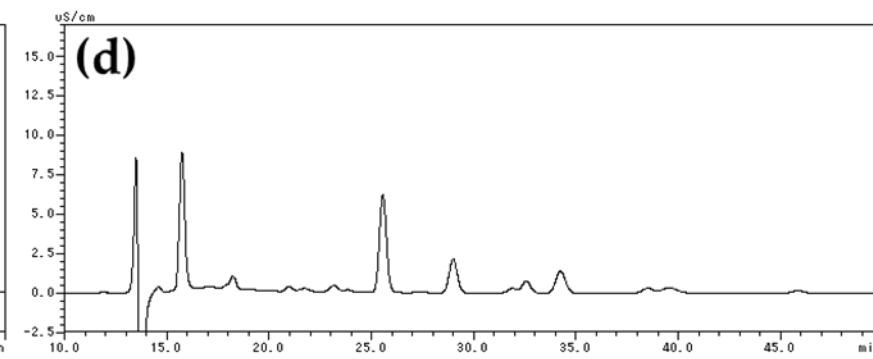

8 Weeks

Figure S1. (Continued)

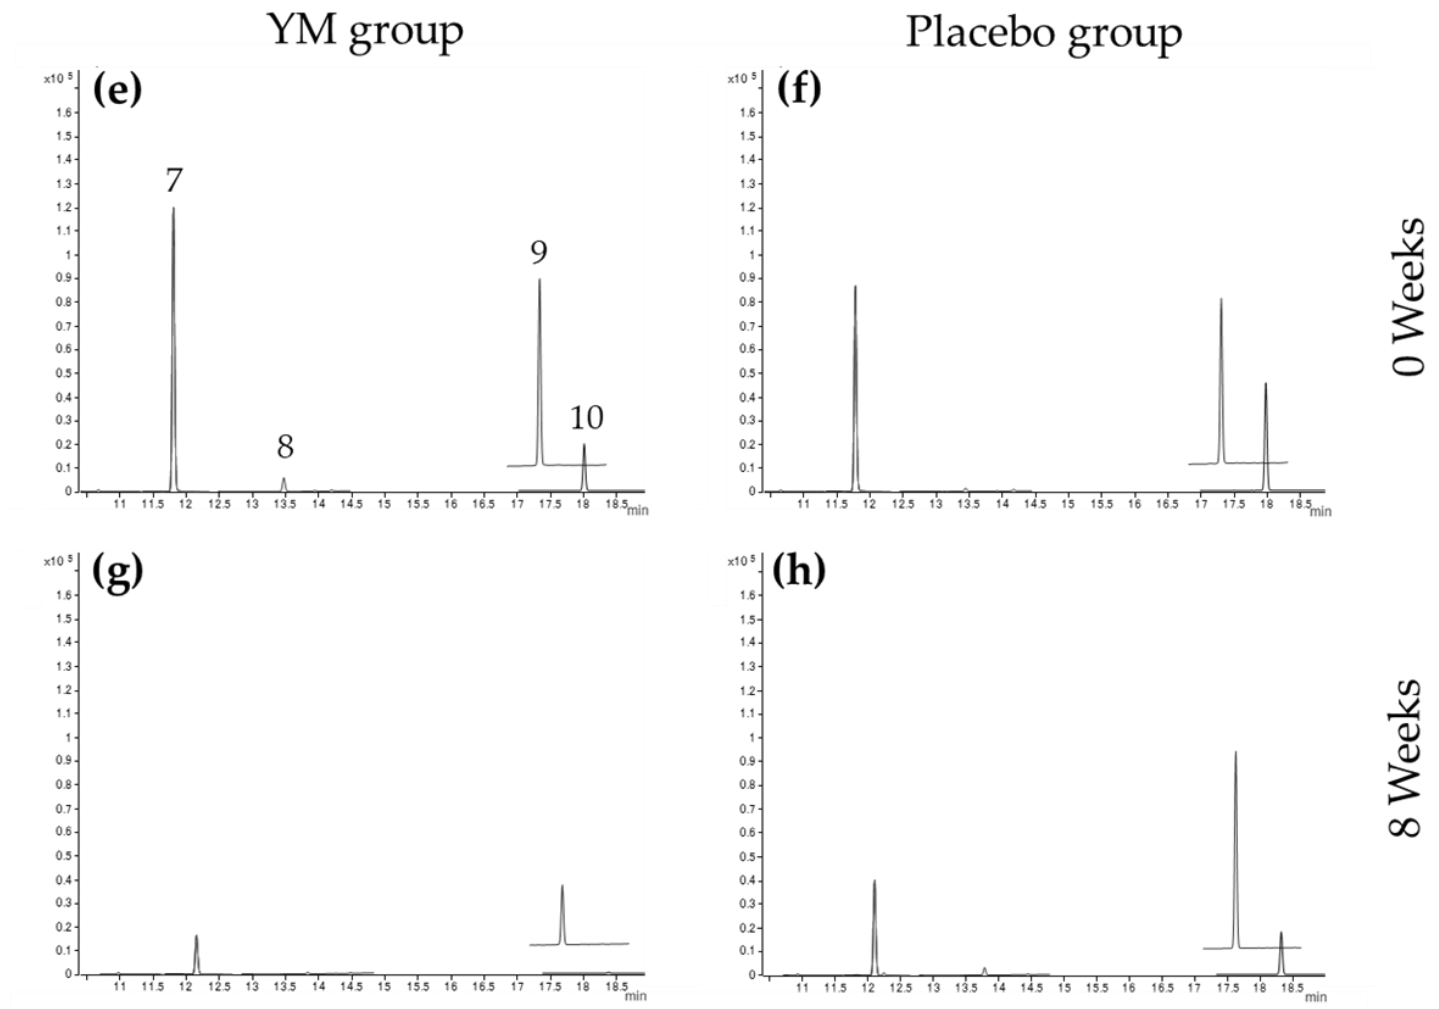

**Figure S1.** The typical chromatographic profiles of feces samples.



HPLC and GC-MS chromatograms in feces samples. HPLC chromatograms of YM group before intervention (a), HPLC chromatogram of Placebo group before intervention (b), HPLC chromatogram of YM group after 8 weeks intervention (c), HPLC chromatogram of Placebo group after 8 weeks intervention (d), GC-MS chromatogram of YM group before intervention (e), GC-MS chromatogram of Placebo group before intervention (f), GC-MS chromatogram of YM group after 8 weeks intervention (g), and GC-MS chromatogram of Placebo group after 8 weeks intervention (h): acetic acid (1), propionic acid (2), *iso*-butyric acid (3), *n*-butyric acid (4), *iso*-valeric acid (5), *n*-valeric acid (6), *p*-cresol (7), 4-ethylphenol (8), indole (9), skatole (10). HPLC analysis was performed using a Prominence organic acids analysis system with a CDD-10A conductivity detector (Shimadzu, Kyoto, Japan); two tandemly-arranged Shim-pack SCR-102(H) columns (300 mm × 8 mm inner diameter (i.d.)); a Shim-pack SCR-102(H) guard column (50 mm × 6 mm i.d.). 5 mM *p*-toluenesulfonic acid was used as a mobile phase and 5 mM *p*-toluenesulfonic acid with 100 μM EDTA and 20mM Bis-Tris was used as a pH buffering reagent. The flow rate was 0.8 mL/min. A column temperature was 45 °C. GC-MS analysis was performed using gas chromatography with mass spectrometry (5977A, Agilent Technologies, CA, USA) and a capillary column (DB WAX UI+G, 60 m × 0.25 mm × 0.25 μm, Agilent Technologies, CA, USA). Sample injection volume was 0.8 μl with splitless mode. Chromatography was performed under constant flow set at 1.7 ml/min. The GC oven was initially set to 70°C for 2 min after sample injection, then heated to 190°C at 25°C/min ramp rate, heated to 200°C at 2°C/min ramp rate, heated to 240°C at 25°C/min ramp rate, and kept constant at 240°C for 8 min. Mass spectra were recorded in the SIM mode. The ions monitored in SIM runs were: *m/z* 107.1 for *p*-cresol and 4-ethylphenol, *m/z* 117.1 for indole, and *m/z* 130.1 for skatole. SIM chromatograms were overlaid in a single GC-MS chromatogram chart. HPLC: High performance liquid chromatography. GC-MS: Gas chromatography and mass spectrometry. SIM: selective ion monitoring.
